# Supplementary material for: Long-Term Safety and Efficacy of CD19 Humanized Selective CAR-T Therapy in B-ALL Patients Who Have Previously Received Murine-Based CD19 CAR-T Therapy
Source: PubMed Central journal article supplement (PMC9253302; doi:10.3389/fonc.2022.884782), 2022-06-21
Supplement: DataSheet_1.pdf [file DataSheet_1.pdf]

## Supplementary Information

### Supplementary figure legends

Figure S1. Statistical analysis of infusion dosages. (A) Comparison of the 1<sup>st</sup> and 2<sup>nd</sup> infusion dosages of CD19m CAR-T and CD19hs CAR-T. Each bar represents the dosage range with the median value as a solid straight line. (B) Distribution of infusion dosages during the 1<sup>st</sup> and 2<sup>nd</sup> treatments with CD19m CAR-T and CD19hs CAR-T.

Figure S2. Cytokine response after 1<sup>st</sup> infusions of CD19hs CAR-T and CD19m CAR-T in patients. (A) and (B) The kinetics of sCD25 after infusions of CD19hs CAR-T and CD19m CAR-T, respectively. (C) and (D) The kinetics of IL-6 after infusion of CD19hs CAR-T and CD19m CAR-T, respectively. (E) and (F) The kinetics of IL-10 after infusion of CD19hs CAR-T and CD19m CAR-T, respectively. (G) and (H) The kinetics of IFN- $\gamma$  after infusions of CD19hs CAR-T and CD19m CAR-T, respectively.

Figure S3. Cytokine response after the 2<sup>nd</sup> infusions of CD19m CAR-T and CD19hs CAR-T. (A) - (D) (A, sCD25; B, IL-6; C, IL-10 and D, IFN- $\gamma$ ) displayed the comparison of the median concentrations of various cytokines from patients after receiving the 2<sup>nd</sup> infusions of CD19m CAR-T (n=5) or CD19hs CAR-T (n=2). The data are shown as median values with a range of concentrations of various cytokines within 30 days after infusions. Straight lines in each bar indicate the median values. P

values were calculated by using T-test. The significant level was set as 0.05. Levels of individual cytokines were repeatedly tested 7 times within 30 days after infusions.

Figure S4. CD19hs CAR-T expansion and persistence after the 1<sup>st</sup> infusion in patients. (A) CD19hs CAR gene copy numbers (n=8) after infusions. (B) The relative fold change of CD19hs CAR-T transgene copy numbers after infusions in patients. (C) Cell count of CD19hs CAR-T in PB. (D) Proportions of CD19hs CAR-T in PB after infusions. The data about Patient 1 to 5 in Figure S4 were cited from a previous publication with PMID: 31300451.

Figure S5. The proportions and cell counts of CD19m CAR-T and CD19hs CAR-T in the peripheral blood (PB) of patients No. 1 to 5. (A) and (B) The kinetics of CAR-T percentage and of CAR-T cell counts in the PB of patient No. 1. (C) and (D) The kinetics of CAR-T percentage and of CAR-T cell counts in the PB of patient No. 2. (E) and (F) The kinetics of CAR-T percentage and of CAR-T cell counts in the PB of patient No. 3. (G) and (H) The kinetics of CAR-T percentage and of CAR-T cell counts in the PB of patient No. 4. I and J, The kinetics of CAR-T percentage and of CAR-T cell counts in the PB of patient No. 5. The red dotted lines represented the 1<sup>st</sup> infusions of CD19hs CAR-T, the green solid lines represented the 1<sup>st</sup> infusions of CD19m CAR-T, the blue dotted lines represented the 2<sup>nd</sup> infusion of CD19m CAR-T. The black arrows indicated the time of the consecutive 2<sup>nd</sup> infusions of CD19m CAR-T. Figure S5 was cited from a previous publication with PMID: 31300451.

Figure S6. The proportions and cell counts of CD19m CAR-T and CD19hs CAR-T in the PB of patients No. 6 to 8. (A) and (D) The proportions and cell counts of CAR-T in PB of patient No. 6. (B) and (E) Patient No. 7. (C) and (F) Patient No. 8. The red dotted line represent the 1<sup>st</sup> infusions of CD19hs CAR-T; The green solid lines represent the infusion(s) of CD19mCAR-T. The black arrows indicate the time of the consecutive 2<sup>nd</sup> infusions of CD19m CAR-T.

Figure S7 Comparisons of the mean values of the median CAR-T percentages and cell counts in the PB within 30 days after the 1<sup>st</sup> and 2<sup>nd</sup> infusions of CD19m CAR-T and CD19hs CAR-T, respectively. (A) and (B) the mean values of median CAR-T percentages and cell counts within 30 days after the 1<sup>st</sup> infusions of CD19m CAR-T (n=8) and CD19hs CAR-T (n=8). Results are shown as scatter dot plots of the mean values with range. (C) and (D) the mean values of median CAR-T percentages and cell counts in PB within 30 days after the 2<sup>nd</sup> infusions of CD19m CAR-T (n=5) and CD19hs CAR-T (n=2). Results are shown as scatter dot plots of the means with range. P values were determined by using T-test, and the significant levels were set as 0.05. Each parameter was repeatedly tested 7 times within 30 days after infusions.

Figure S8. Expansion and persistence of CD19hs CAR-T after the 1<sup>st</sup> and 2<sup>nd</sup> infusions. (A) and (B) The copy number and relative fold change of hsCAR after the 1<sup>st</sup> and 2<sup>nd</sup> infusions of CD19hs CAR-T. (C) - (H) Comparisons of CAR-T percentage

and cell counts after the 1<sup>st</sup> and 2<sup>nd</sup> infusions of CD19m CAR-T (C and F in Patient No. 2) and CD19hs CAR-T (D and G in Patient No. 4; E and H in Patient No. 5). Figure S8C and Figure S8F were cited from a previous publication with PMID: 31300451.

Figure S9. Examination of CAR-specific antibodies in the sera of patients before and after CD19hs CAR-T infusions. (A) Anti-CAR immunoglobulins, including IgA, IgG and IgM were measured in the sera of patients who had received CD19m CAR-T without bridging to HSCT before and after CD19hsCAR-T infusions (n=4). (B) Anti-CAR immunoglobulins, including IgA, IgG and IgM were measured in the sera of patients who had received CD19m CAR-T bridging to allo-HSCT prior to CD19hs CAR-T infusions (n=4). (C) Anti-CAR antibodies were measured in serum samples from healthy donors (n=2). The cut-off-value of OD450 was set as 0.2. The data are shown as mean  $\pm$  SEM by using scatter dot plots. The data about 3 of the 4 patients used in Figure S9 were cited from a previous publication with PMID: 31300451.

Figure S1

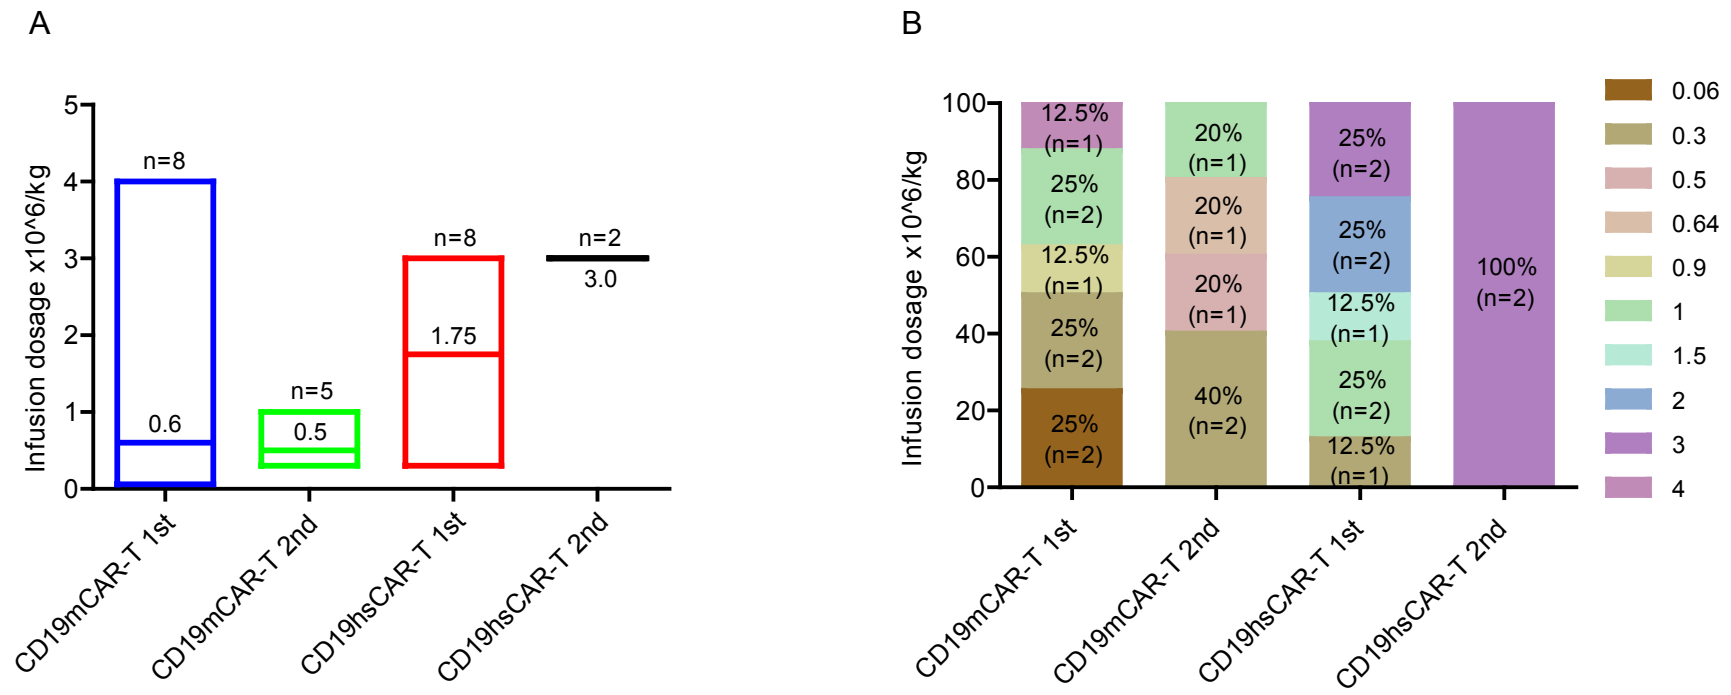

Figure S2

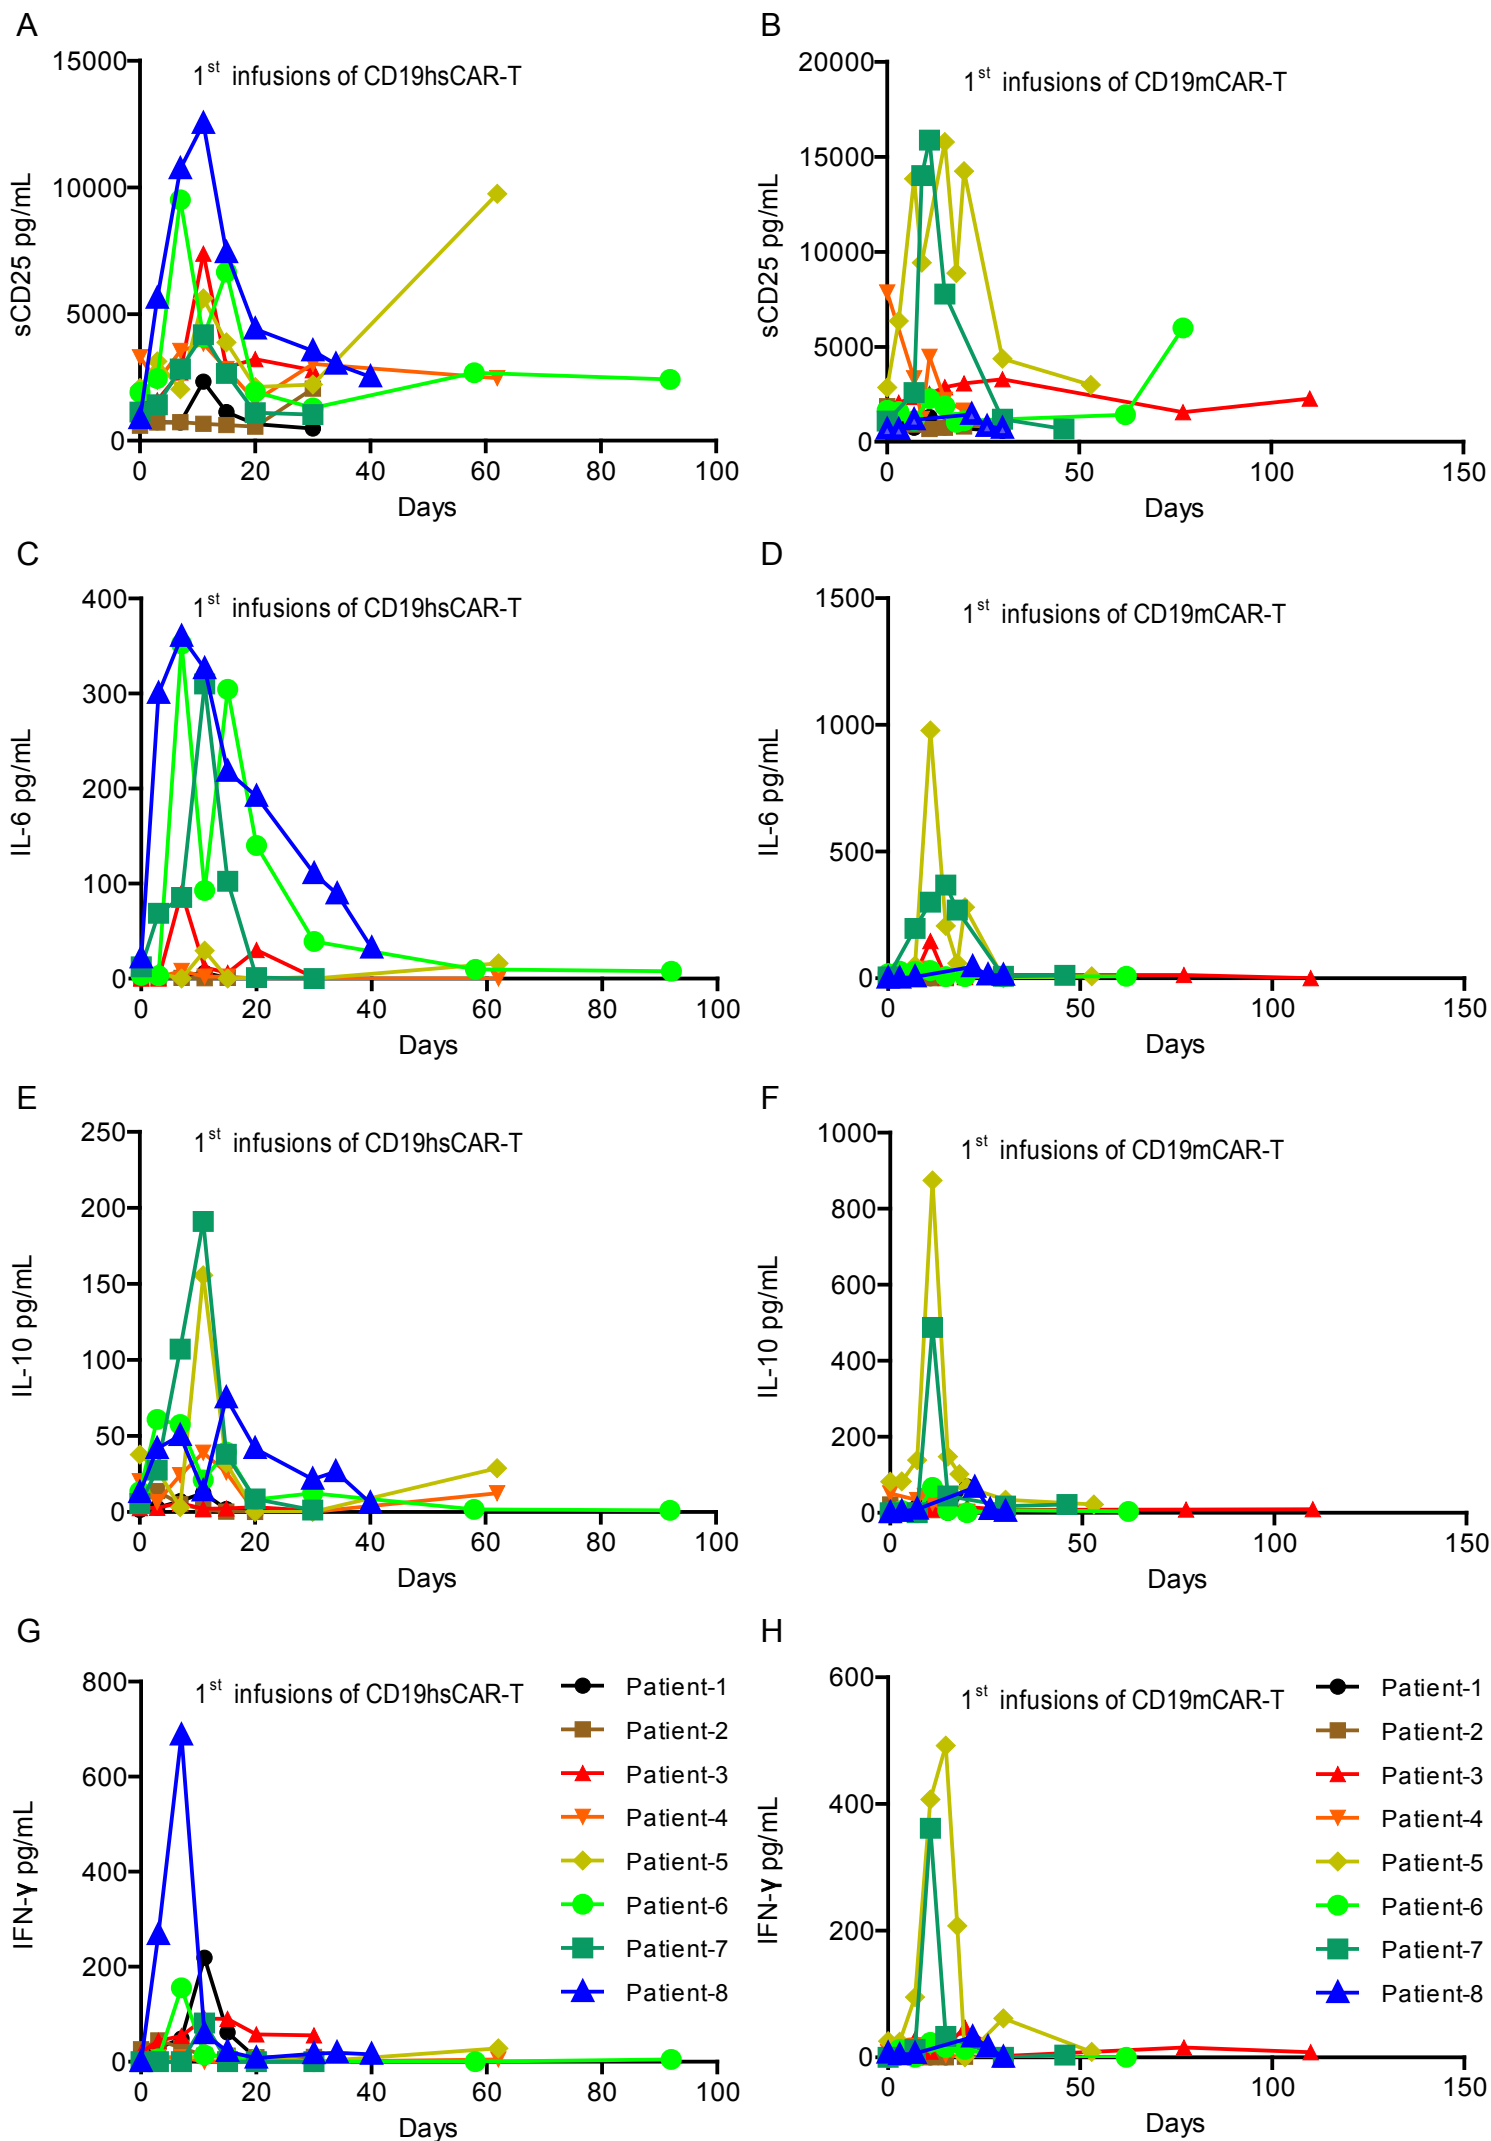

Figure S3

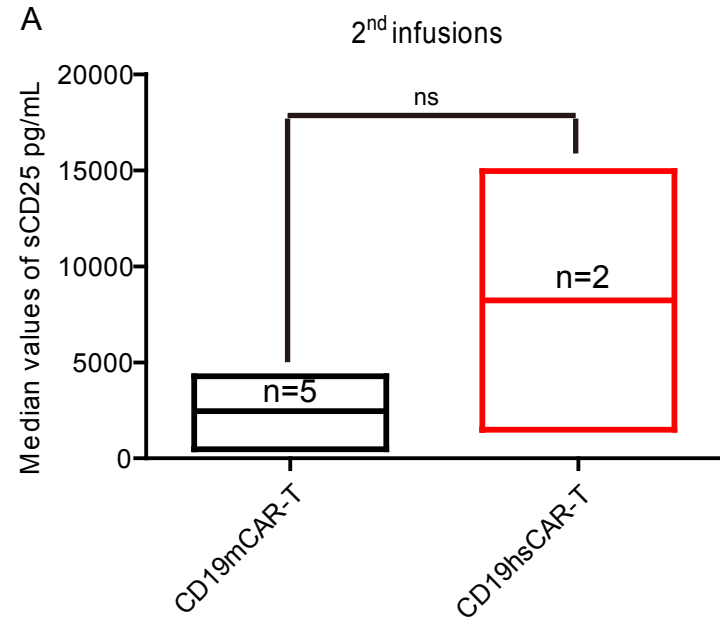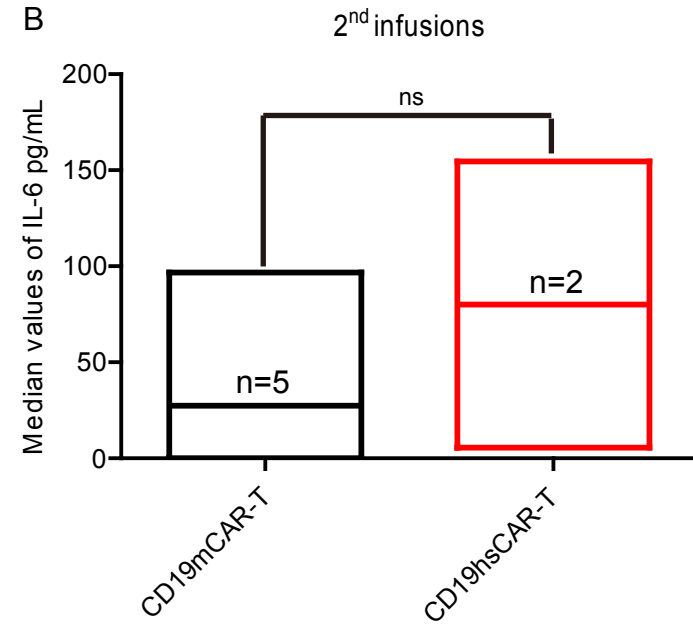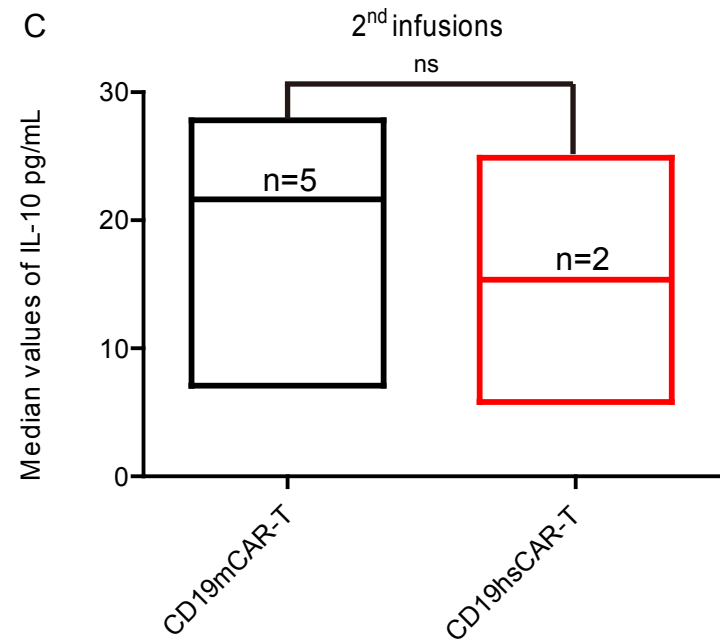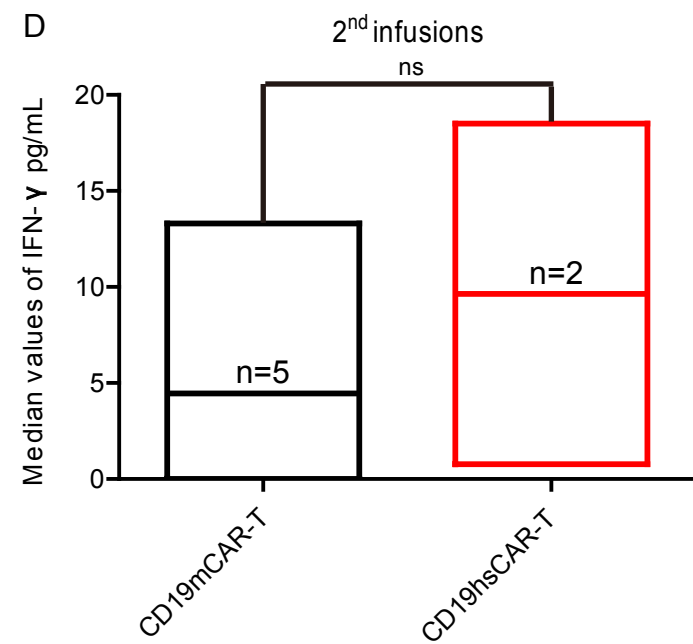

Figure S4

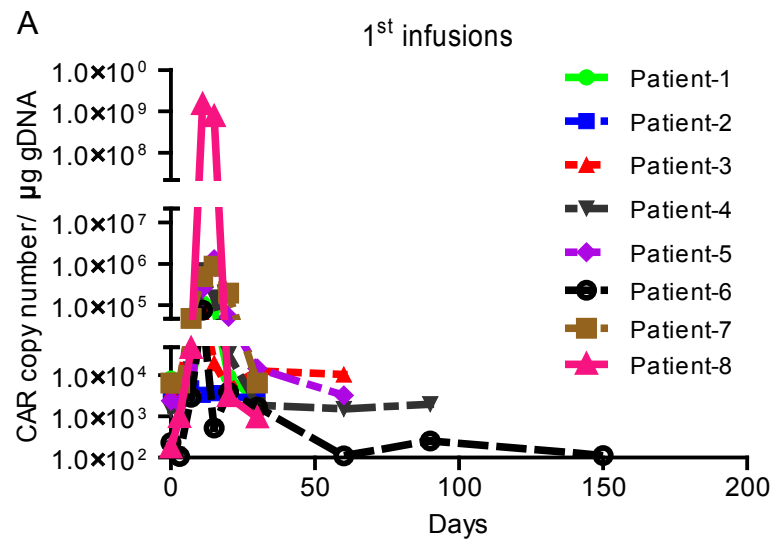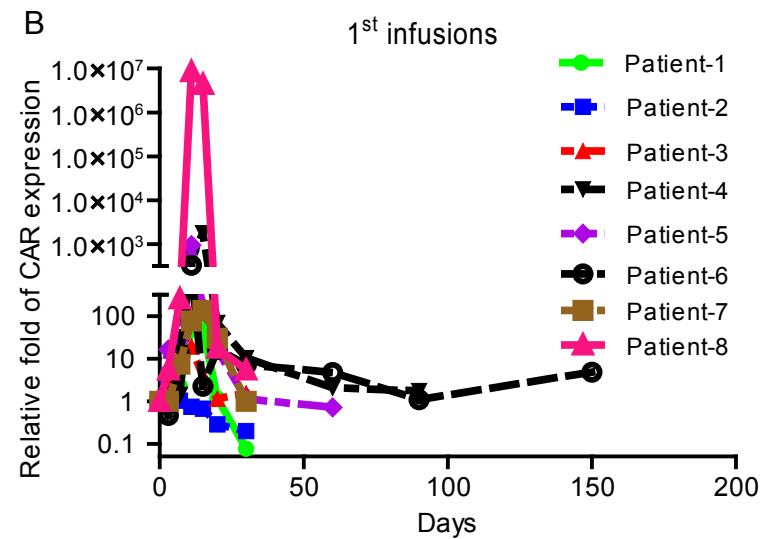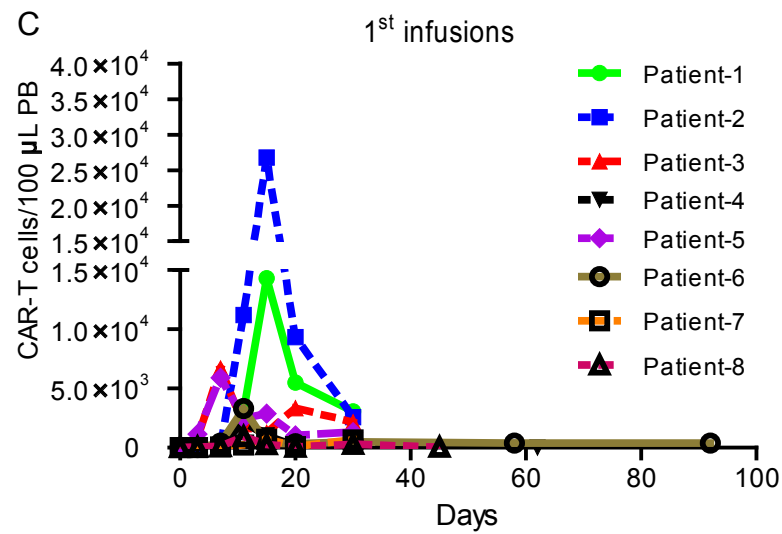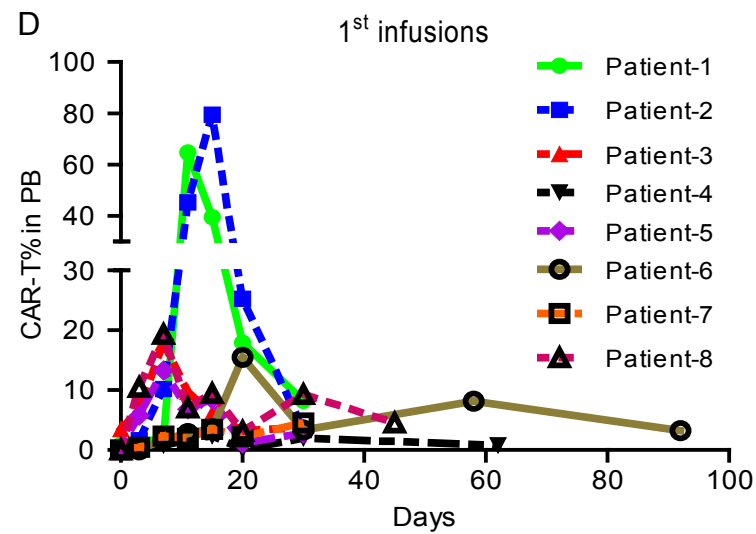



Figure S5

Patient-1

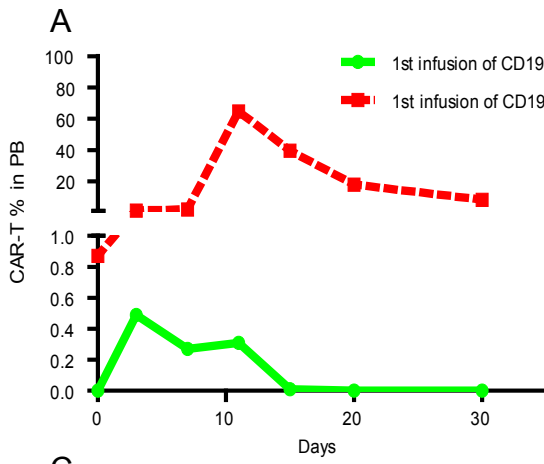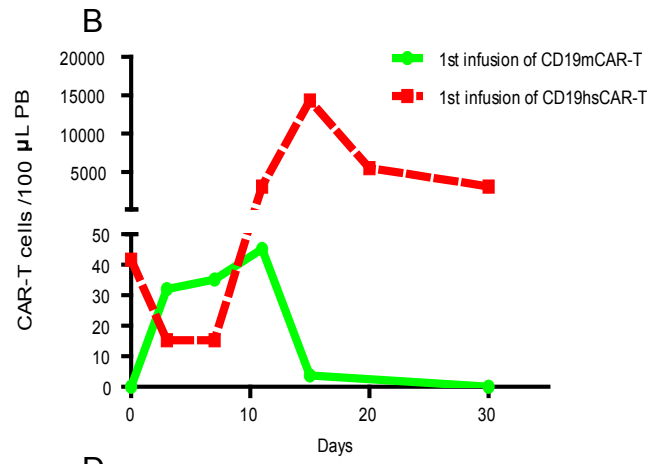

Patient-2

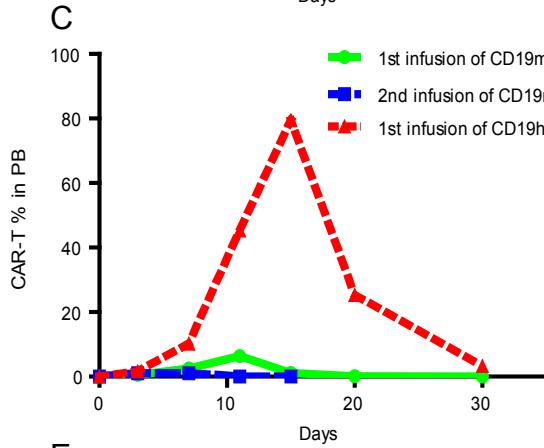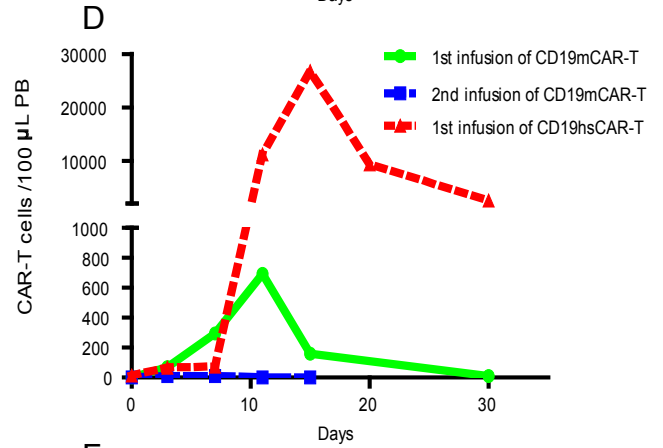

Patient-3

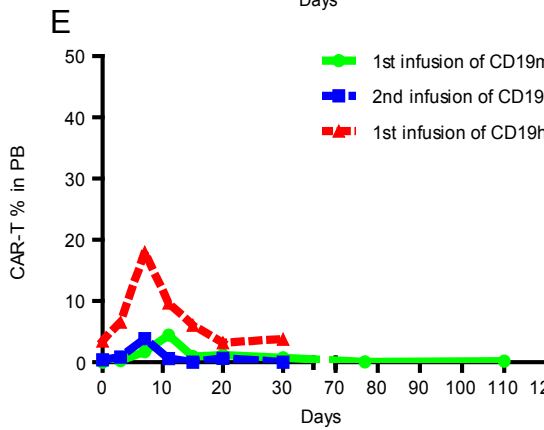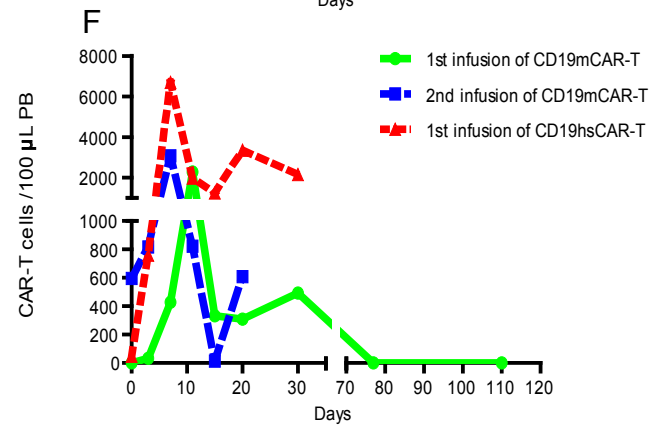

Patient-4

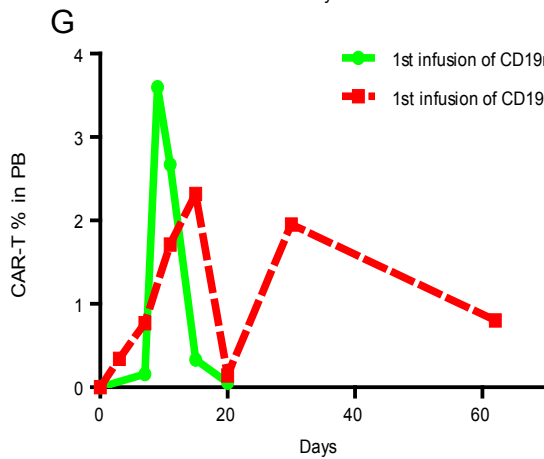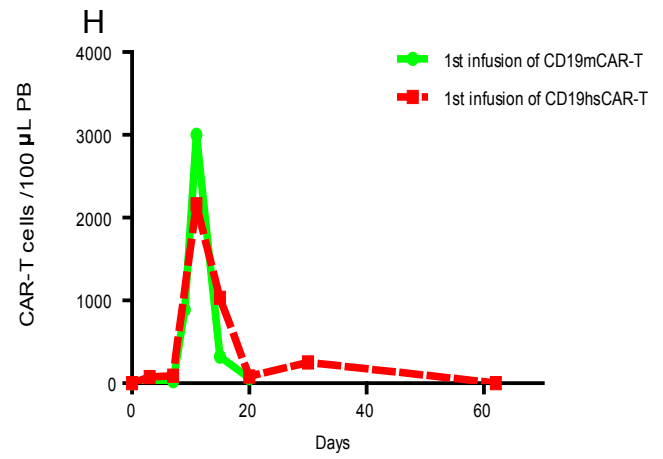

Patient-5

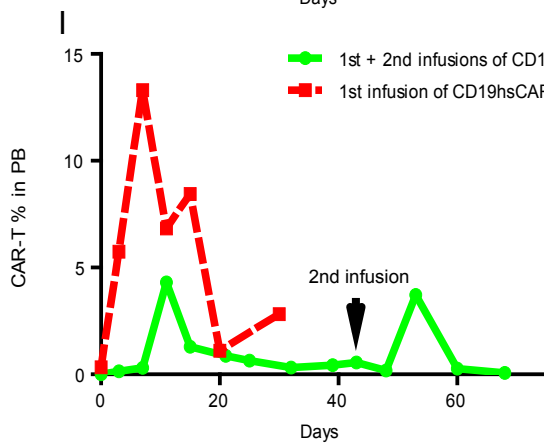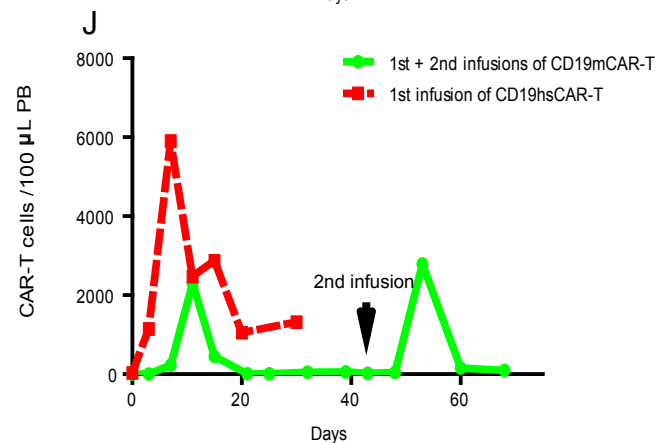

Figure S6

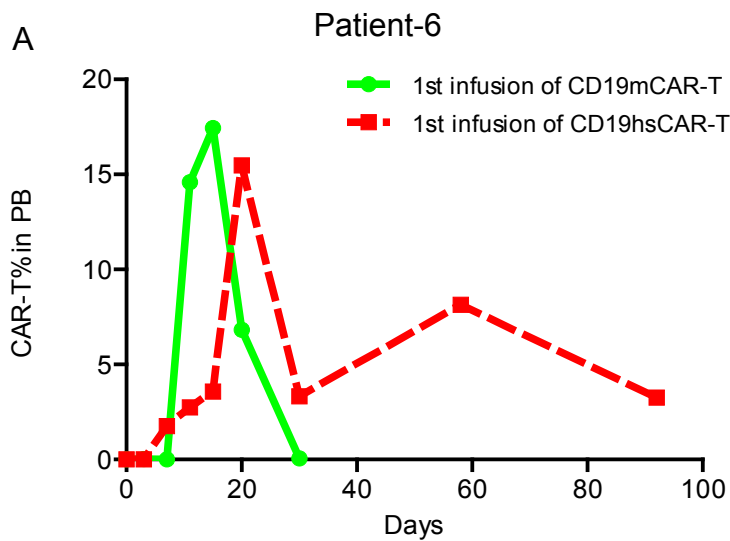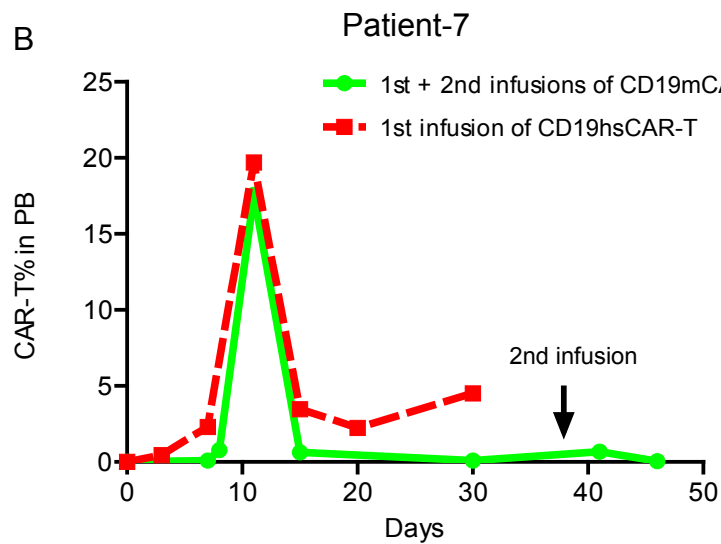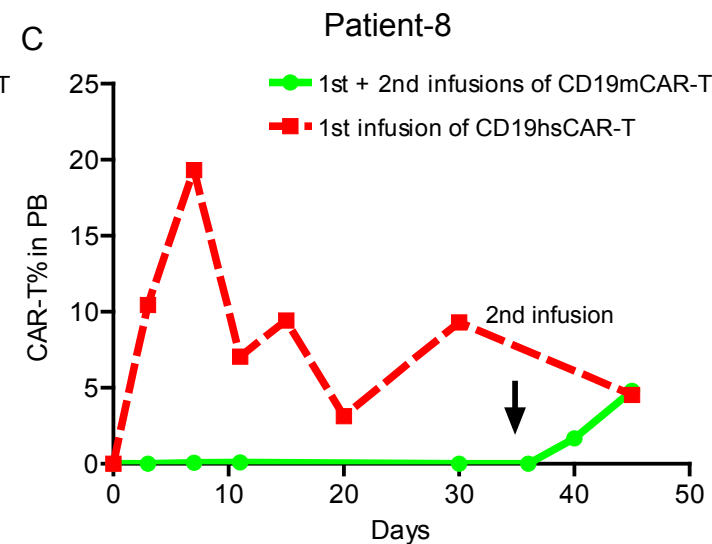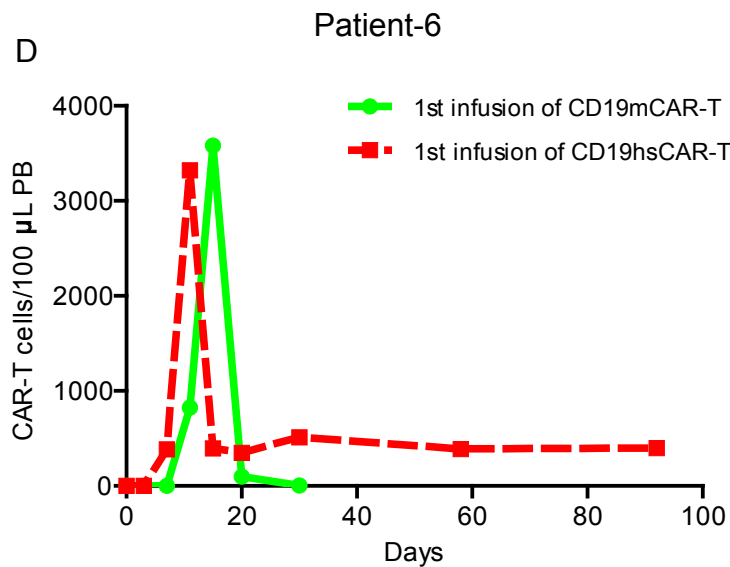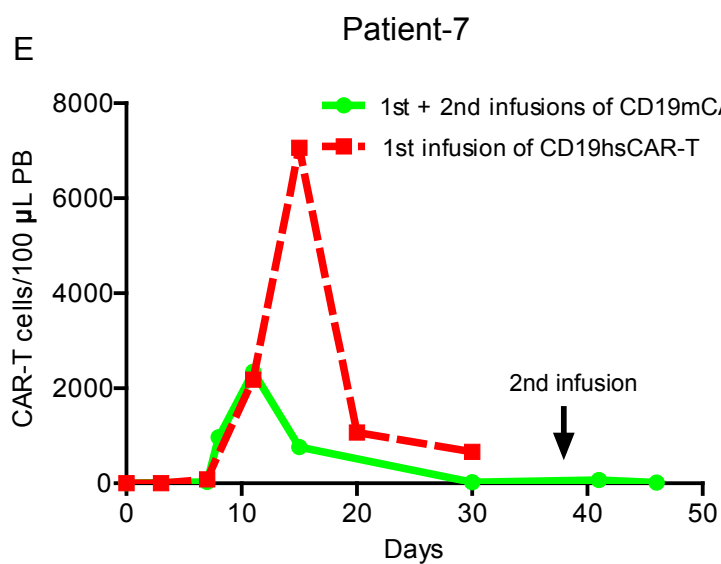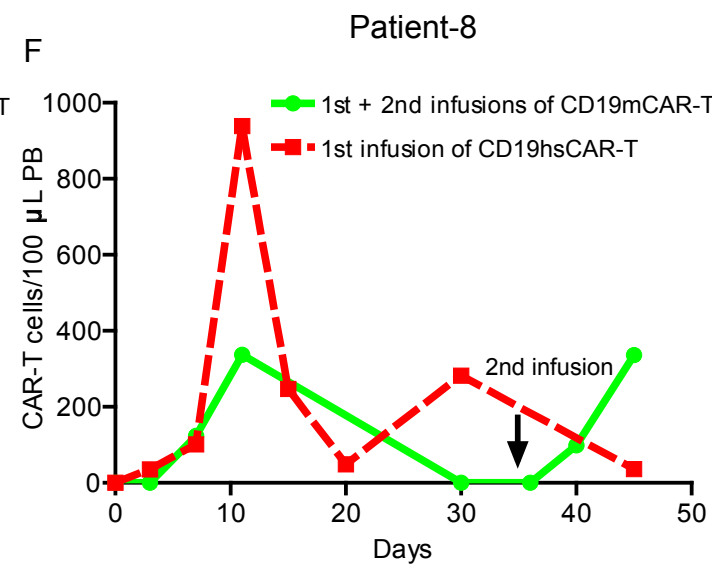

Figure S7

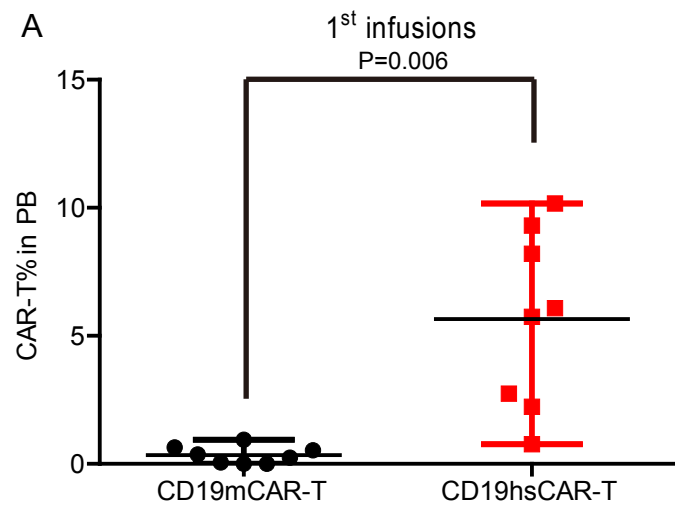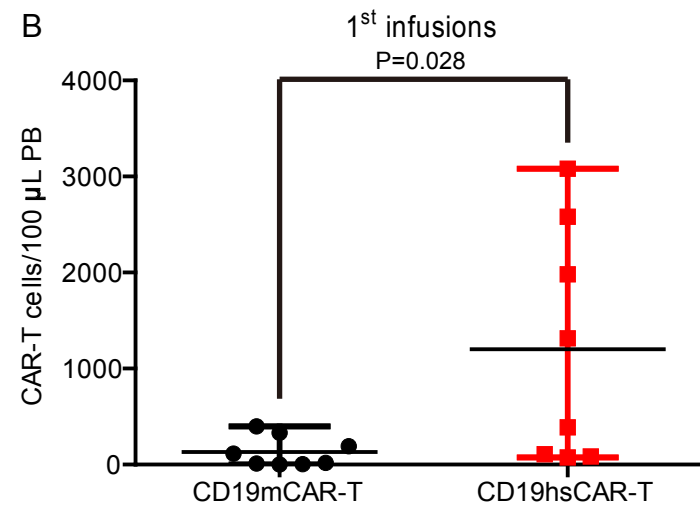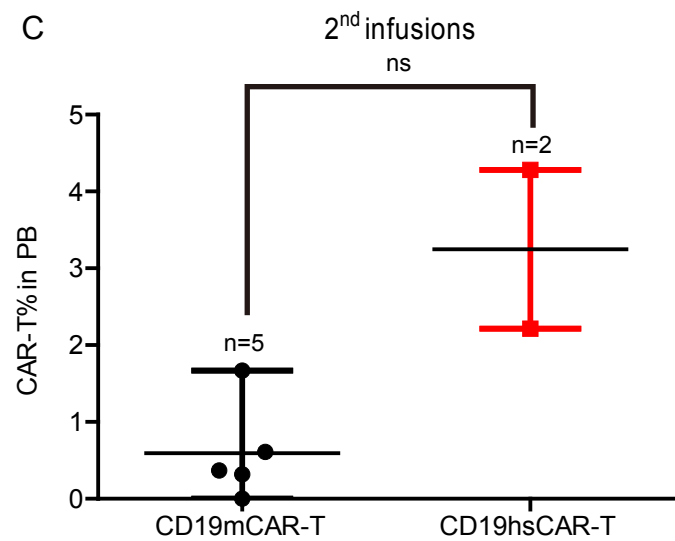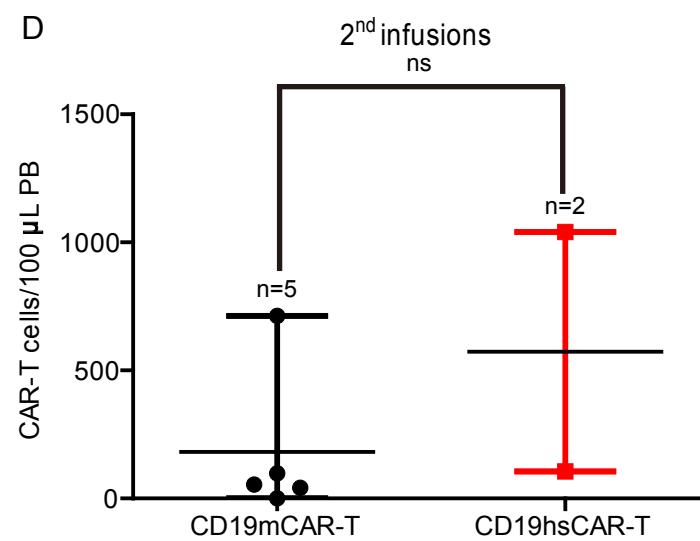

Figure S8

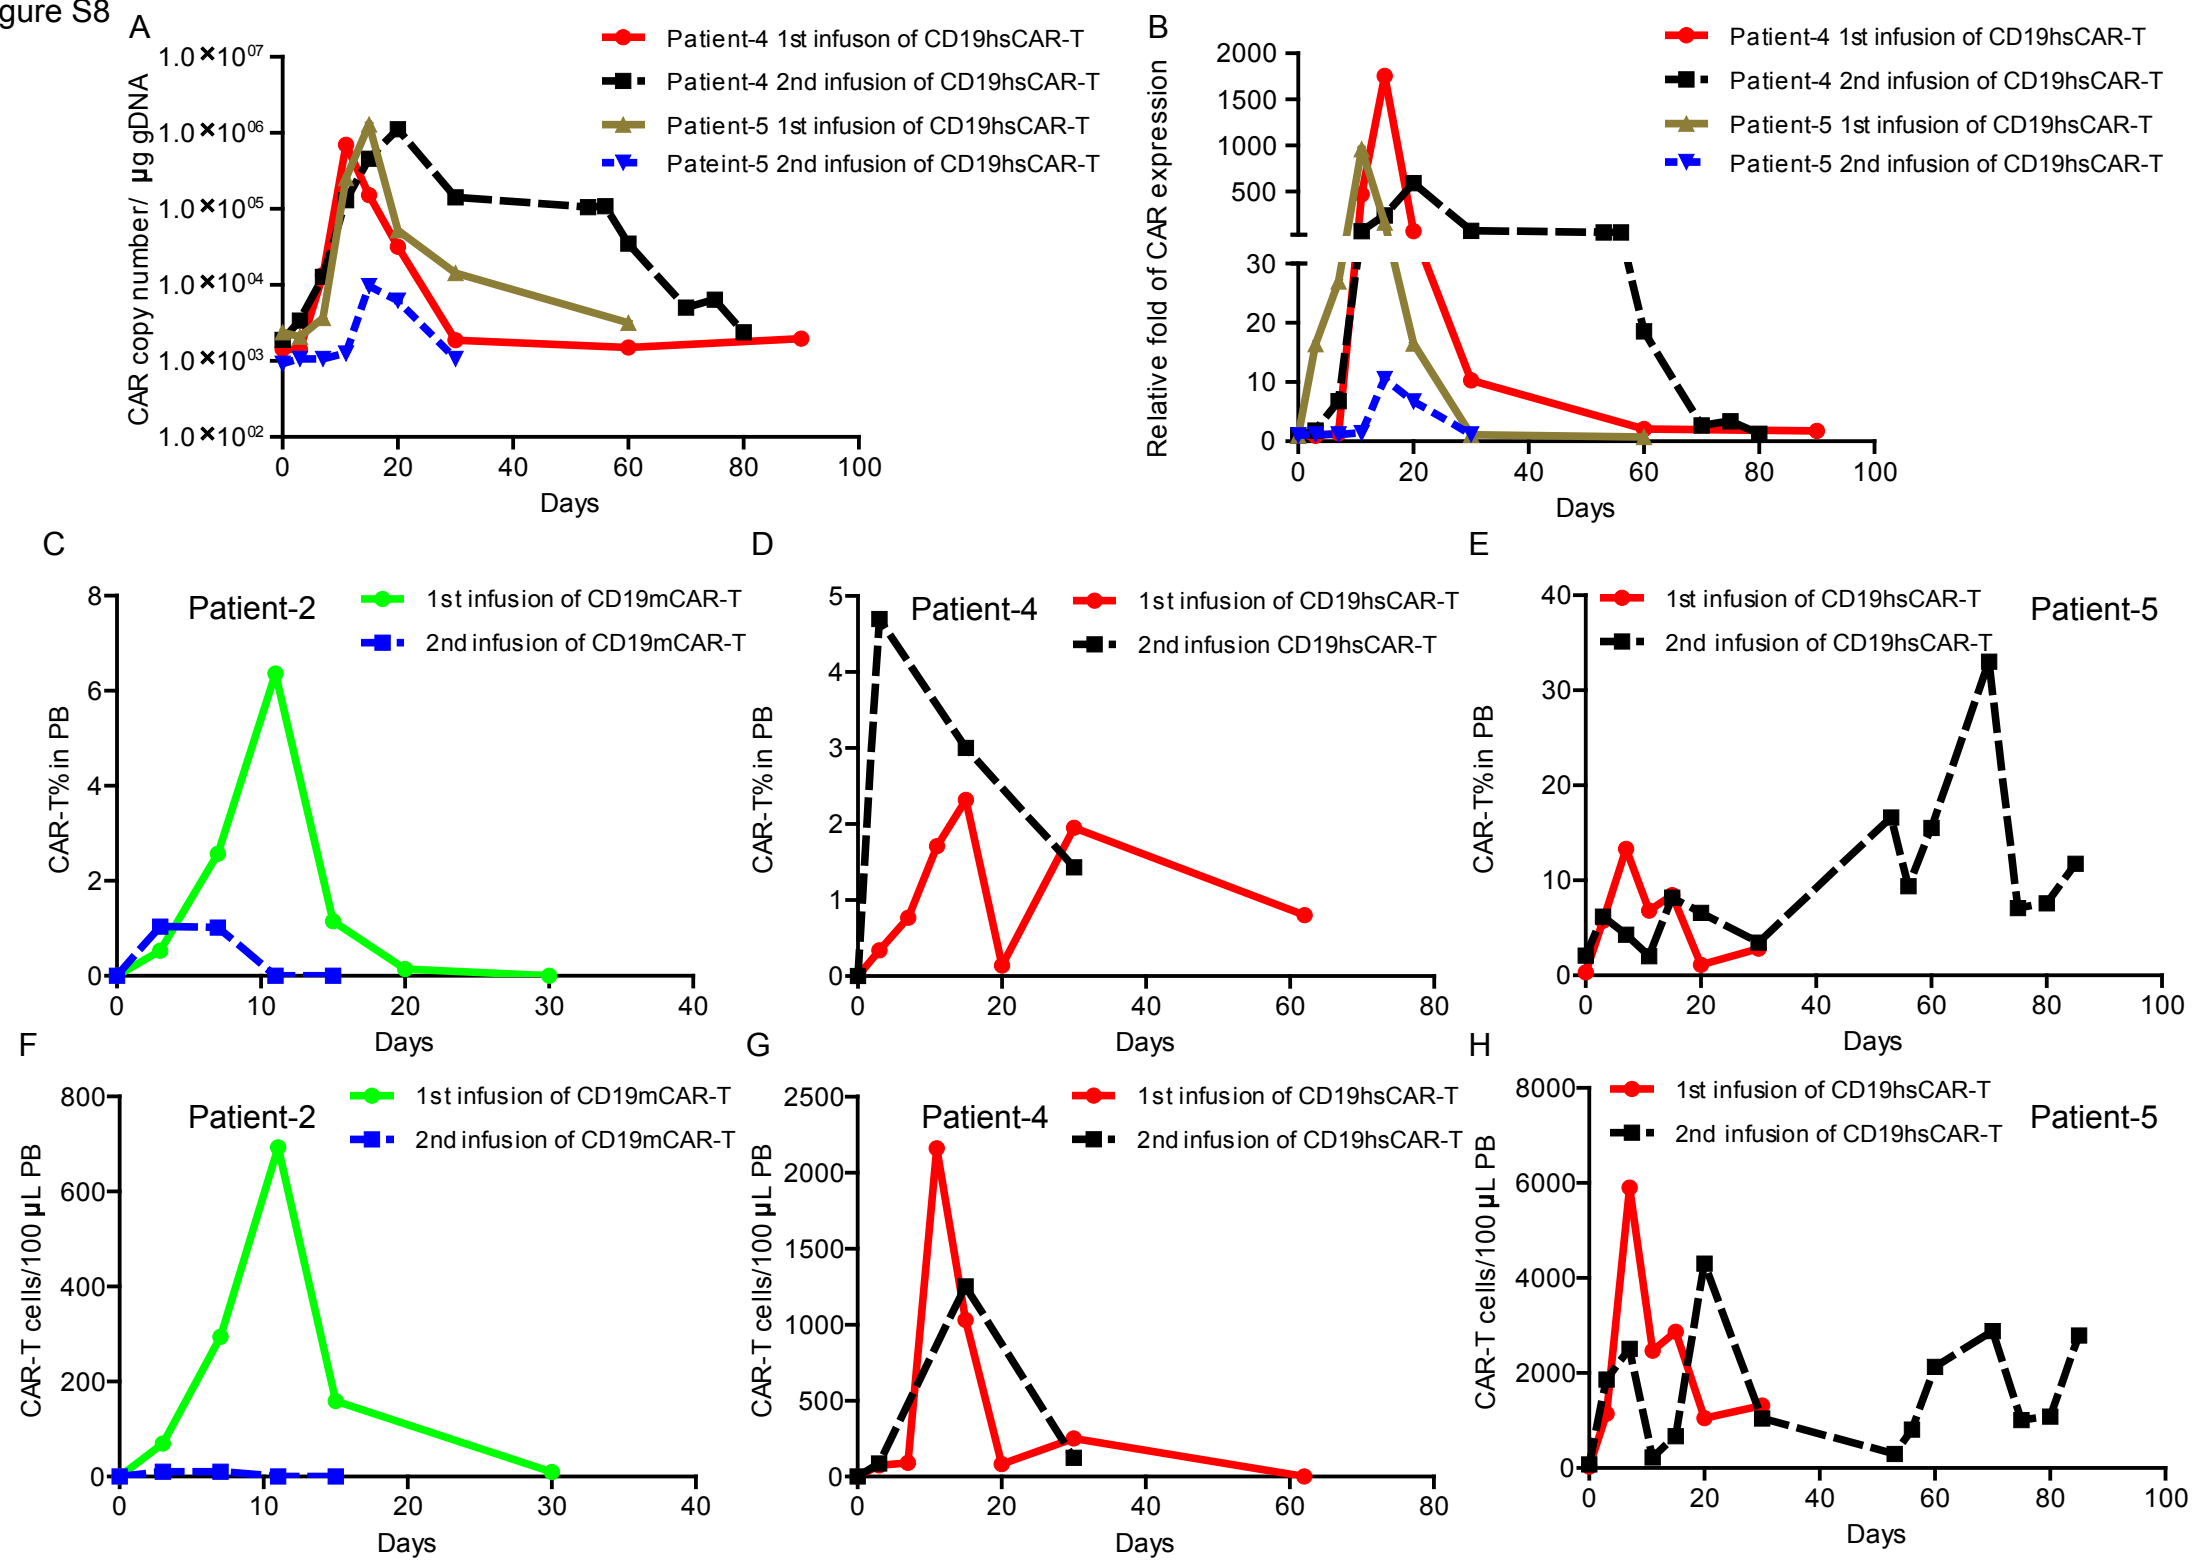

Figure S9

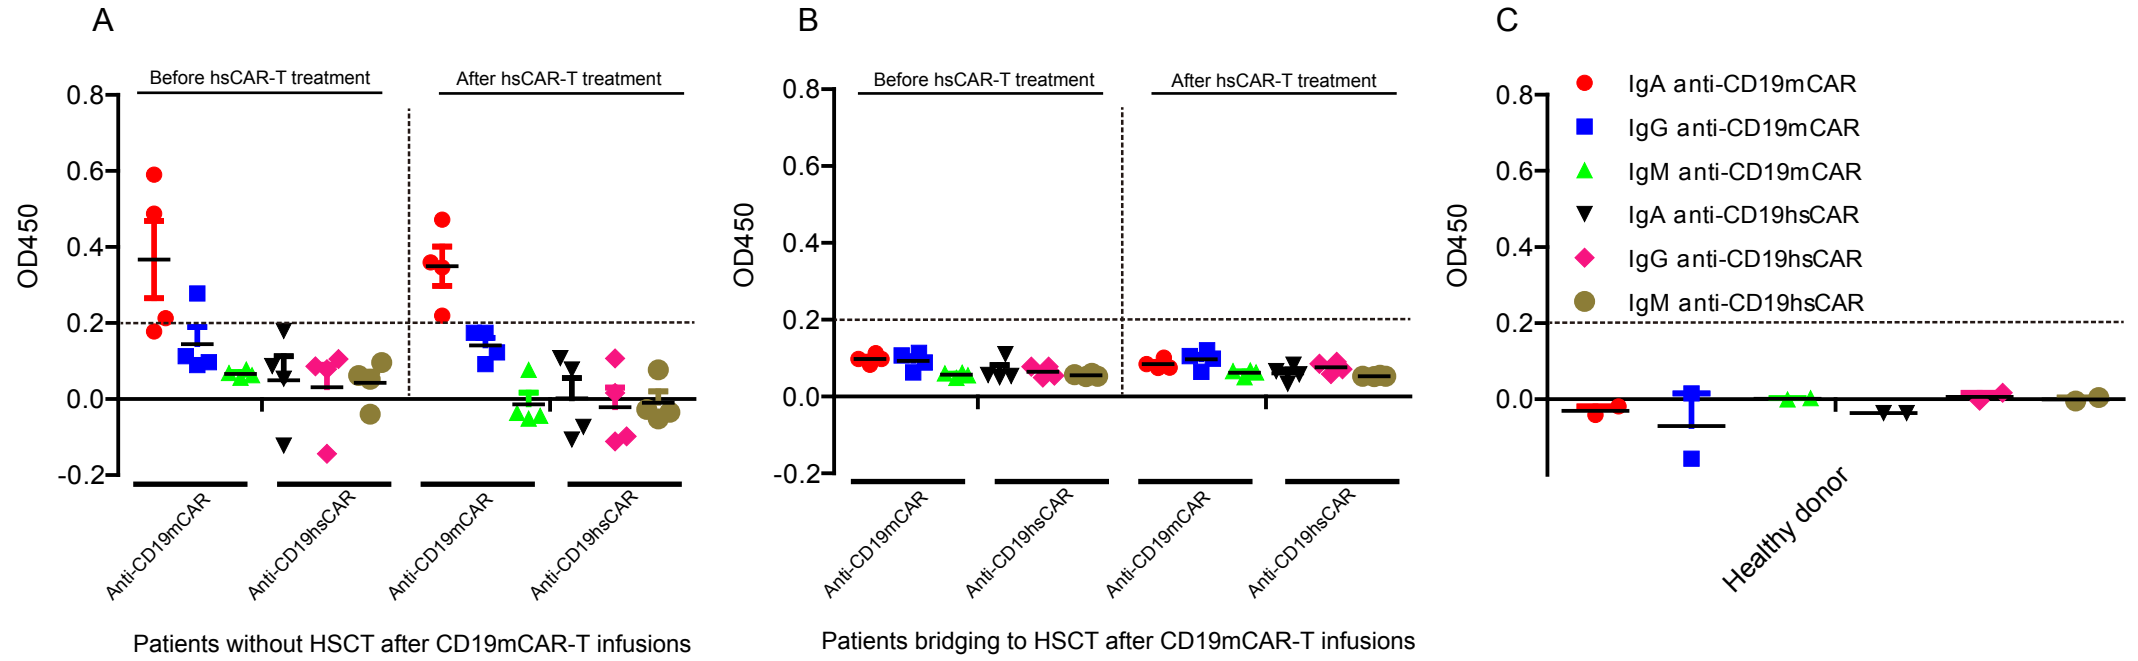

Table S1. Major treatments for the enrolled patients in this study.

|                               |   |                | Patient No.                                                                   |                                                                                    |                                                                                                                                |                                                                                              |                                                                                           |                                                                          |                                                                      |                                                                             |
|-------------------------------|---|----------------|-------------------------------------------------------------------------------|------------------------------------------------------------------------------------|--------------------------------------------------------------------------------------------------------------------------------|----------------------------------------------------------------------------------------------|-------------------------------------------------------------------------------------------|--------------------------------------------------------------------------|----------------------------------------------------------------------|-----------------------------------------------------------------------------|
|                               |   |                | 1                                                                             | 2                                                                                  | 3                                                                                                                              | 4                                                                                            | 5 <sup>§</sup>                                                                            | 6                                                                        | 7                                                                    | 8                                                                           |
| Major treatments and outcomes | 1 | Time/treatment | Sep., 2017/VLDL and CAM                                                       | Jul., 2017/FLU, CTX and VLP                                                        | Nov., 2014/VCR, DNR, L-aps, prednisone and Gleevec                                                                             | Jul., 2016/Prednisone, CTX, DNR, and VDLP                                                    | Jul., 2016/CODP                                                                           | Aug., 2017/CVLP and Imatinib                                             | Mar., 2018/VDLP and VDCLP                                            | Aug., 2017/VLDL, CAM, MTX                                                   |
|                               |   | Outcomes       | CR with MRD+ and E2A-HLF+ for 3 mon, and then relapsed in BM with CD19+ B-ALL | CR with MRD+ and E2A-HLF+ for 5 mon, and then relapsed in BM with CD19+ B-ALL      | CR with MRD+ and BCR-ABL1+ for 12 mon, and then relapsed in the CNS with CD19+ B-ALL                                           | CR with MRD+ for 1 mon, then relapsed                                                        | Achieved CR with MRD- for 2 mon                                                           | CR with MRD+ and BCR-ABL1+ for 1 mon, then relapsed                      | Achieved CR with MDR+ for 3 mon                                      | CR with MDR- for 12 mon via long-term chemotherapy, and then relapsed in BM |
|                               | 2 | Time/treatment | Dec., 2017/CTX Ara-C phase I and II                                           | Nov., 2017/CD19mCAR-T (0.3×10 <sup>6</sup> /kg)                                    | Dec., 2015/MTX, L-aps and Dasatinib combined with intrathecal chemotherapy with Ara-C, Dex and MTX                             | Sep., 2016/CAM, hyper-CVAD/A, L-asp and Dex                                                  | Sep.2016~ Jan., 2017/Hyper-CVAD /B ×2, VP, CVAD/A, hyper-CVAD/B for consolidation therapy | Sep. ~Oct., 2017/CAM and Imatinib                                        | Jul., 2018/MA for consolidation therapy                              | Aug., 2018/HR1, HR2 and HR3                                                 |
|                               |   | Outcomes       | NR with MRD+ and E2A-HLF+                                                     | CR with MRD- and E2A-HLF- for 3 mon, then relapsed in BM with CD19+ B-ALL          | CR with MRD- and BCR-ABL1+ without extramedullary disease in the CNS for 4 mon, and then relapsed in the CNS with CD19+ B-ALL  | NR with MRD+, and then relapsed in PB and BM with CD19+ B-ALL                                | CR with MRD- for 7 mon in total, and then relapsed in PB and BM with CD19+ B-ALL          | NR with relapse and BCR-ABL1+                                            | Maintaining CR with MDR+ for 4 mon in total                          | CR with MDR+                                                                |
|                               | 3 | Time/treatment | Feb., 2018/MTX, Dex and L-asp                                                 | Apr., 2018/CD19mCAR-T combined with CD22mCAR-T (0.3×10 <sup>6</sup> /kg for each)  | Apr., 2016/IDA, Dex, and L-asp                                                                                                 | Nov., 2016/CD19mCAR-T (1×10 <sup>6</sup> /kg)                                                | Feb.~ May, 2017/Hyper-CVAD /A,VDLP and VLP                                                | Nov., 2017/CTX, Dex, Dasatinib and VILP                                  | Aug., 2018/VDCLP for consolidation therapy                           | Dec., 2018/Auto-CD19m CAR-T (6×10 <sup>4</sup> /kg)                         |
|                               |   | Outcomes       | NR with MRD+ and E2A-HLF+                                                     | NR with tumor burden increased                                                     | CR with MRD- and BCR-ABL1- without extramedullary disease in the CNS                                                           | CR with MRD- for 1 mon                                                                       | NR                                                                                        | NR                                                                       | Maintaining CR with MDR+ for 8 mon in total, and then relapsed in BM | NR with tumor burden increased                                              |
|                               | 4 | Time/treatment | Mar., 2018/FLU, IDA and CTX                                                   | May, 2018/CD19hsCAR-T (0.3×10 <sup>6</sup> /kg)                                    | May, 2016/Haploidentical allo-HSCT (mother as donor)                                                                           | Jan., 2017/Allo-HSCT followed by donor-derived NK infusions ×2 (full-match, sister as donor) | Jun., 2017/CD19mCAR-T (1×10 <sup>6</sup> /kg) §                                           | Jan., 2018/CVLP and Ponatinib                                            | Jan., 2019/DAC, CTX, MIT, VP-16                                      | Jan., 2019/VNLD and humanized CD19CAR-T (6.4×10 <sup>5</sup> /kg)           |
|                               |   | Outcomes       | NR with MRD+ and E2A-HLF+                                                     | Tumor burden was decreased at Day15 after infusion, but NR at Day30 after infusion | CR with MRD- and BCR-ABL1- without extramedullary disease in the CNS for 12 mon, and then relapsed in the CNS with CD19+ B-ALL | CR for 18 mon, and then relapsed in PB and BM with CD19+ B-ALL                               | NR                                                                                        | NR with tumor burden increased                                           | NR with tumor burden increased                                       | CR with MDR+                                                                |
|                               | 5 | Time/treatment | Apr., 2018/CD19mCAR-T combined with CD22mCAR-T (0.3×10 <sup>6</sup> /kg for   |                                                                                    | Aug., 2017/CD19mCAR-T (4×10 <sup>6</sup> /kg), followed by donor-derived NK infusions x5;                                      | Sep., 2018/CD19hsCAR-T (3×10 <sup>6</sup> /kg)                                               | Jul., 2017/CD19mCAR-T (1×10 <sup>6</sup> /kg) §                                           | Feb., 2018/CD19mCAR-T (0.9×10 <sup>6</sup> /kg) combined with CD22mCAR-T | Apr., 2019/VLP                                                       | Mar., 2019/Haploidentical allo-HSCT (mother as donor)                       |

|      |                |                                                                              |  |                                                                                                                                    |                                                                           |                                                                   |                                                                   |                                                                                                  |                                                                         |
|------|----------------|------------------------------------------------------------------------------|--|------------------------------------------------------------------------------------------------------------------------------------|---------------------------------------------------------------------------|-------------------------------------------------------------------|-------------------------------------------------------------------|--------------------------------------------------------------------------------------------------|-------------------------------------------------------------------------|
|      |                | each)                                                                        |  | Mar.,<br>2018/CD19mCAR-T<br>(0.3×10 <sup>6</sup> /kg)                                                                              |                                                                           |                                                                   | (1×10 <sup>6</sup> /kg)                                           |                                                                                                  |                                                                         |
|      | Outcomes       | CR with MRD- and E2A-HLF- for 1mon, and then relapsed in BM with CD19+ B-ALL |  | CR with MRD- and BCR-ABL1- without extramedullary disease in the CNS for 8 mon, then relapsed in BM and the CNS                    | CR with MDR- for 11 mon. and then relapsed with CD19+ B-ALL in BM.        | CR with MRD-                                                      | CR with MRD-                                                      | Tumor burden decreased but failed to achieve CR                                                  | CR with MDR- for 6 mon, and then relapsed in BM                         |
| 6    | Time/treatment | May,<br>2018/CD19hsCAR-T<br>(1.0×10 <sup>6</sup> /kg)                        |  | May,<br>2018/CD19hsCAR-T<br>(1×10 <sup>6</sup> /kg)                                                                                | Sep., 2019/VLP, Flu and CTX                                               | Aug.,<br>2017/Haploidentical allo-HSCT (father as donor)          | Mar.,<br>2018/Haploidentical HSCT (father as donor)               | Jun.,<br>2019/auto-CD19mCAR-T (6×10 <sup>4</sup> /kg)                                            | Oct. 2019/CTX, VP-16 and Bortezomib                                     |
|      | Outcomes       | CR with MRD- and E2A-HLF- for 2 mon                                          |  | CR with MRD- and BCR-ABL1- without extramedullary disease in the CNS for 2 mon, and then relapsed only in the CNS with CD19+ B-ALL | NR with tumor burden increased.                                           | CR with MDR- for 12 mon, and then relapsed in BM with CD19+ B-ALL | CR with MRD- for 11 mon, and then relapsed in BM with CD19+ B-ALL | Tumor burden decreased, but failed to achieve CR                                                 | NR with tumor burden increased                                          |
| 7    | Time/treatment | Aug.,<br>2018/Allo-HSCT                                                      |  | Sep., 2018/Intrathecal chemotherapy and allo-HSCT                                                                                  | Nov.,<br>2019/CD19hsCAR-T (3×10 <sup>6</sup> /kg)                         | Oct.,<br>2018/CD19hsCAR-T (3×10 <sup>6</sup> /kg)                 | Mar.,<br>2019/CD19hsCAR-T (1.5×10 <sup>6</sup> /kg)               | Jul.,<br>2019/Auto-CD19mCAR-T (5×10 <sup>5</sup> /kg)                                            | Dec.,<br>2019/Allo-CD19hsCAR-T (2×10 <sup>6</sup> /kg, mother as donor) |
|      | Outcomes       | CR for 36 mon                                                                |  | CR for 9 mon, and then died of infections.                                                                                         | CR with MDR+                                                              | CR with MRD- for 11 mon, and then relapsed in BM with CD19+ B-ALL | CR with MRD- for 9 mon, and then LTFU in Jan., 2020               | NR with tumor burden increased                                                                   | CRi with MDR- for 2 mon, and then died of intracranial hemorrhage       |
| 8    | Time/treatment |                                                                              |  |                                                                                                                                    | Dec.,<br>2019/Allo-HSCT                                                   | Oct., 2019/MXT and PC                                             |                                                                   | Aug., 2019/MTX and 6-MP                                                                          |                                                                         |
|      | Outcomes       |                                                                              |  |                                                                                                                                    | CR with MDR- for 18 mon.                                                  | NR with tumor burden increased                                    |                                                                   | NR with tumor burden decreased slightly                                                          |                                                                         |
| 9    | Time/treatment |                                                                              |  |                                                                                                                                    |                                                                           | Nov.,<br>2019/CD19hsCAR-T (3×10 <sup>6</sup> /kg)                 |                                                                   | Sep.,<br>2019/Allo-CD19hsCAR-T (sibling sister as donor, HLA full-match) (2×10 <sup>6</sup> /kg) |                                                                         |
|      | Outcomes       |                                                                              |  |                                                                                                                                    |                                                                           | CR with MDR- for 1 mon., and then relapsed again                  |                                                                   | CR with MRD-                                                                                     |                                                                         |
| 10   | Time/treatment |                                                                              |  |                                                                                                                                    |                                                                           | Jan.,<br>2020/CD22mCAR-T (3×10 <sup>5</sup> /kg)                  |                                                                   | Nov.,<br>2019/Allo-HSCT (sibling sister as donor)                                                |                                                                         |
|      | Outcomes       |                                                                              |  |                                                                                                                                    |                                                                           | NR and died of B-ALL relapse                                      |                                                                   | CR with MDR- for 12 mon, and then LTFU in Oct. 2020.                                             |                                                                         |
| Note |                | CR duration was calculated to the date when this manuscript was prepared.    |  | The second infusion of CD19mCAR-T was consolidating treatment to prevent relapse but failed.                                       | CR duration was calculated to the date when this manuscript was prepared. |                                                                   |                                                                   |                                                                                                  |                                                                         |

Note:

6-MP, 6-mercaptopurine

Ara-C, cytarabine;

allo-HSCT, allogeneic hematopoietic stem cell transplantation;

CAM, complementary and alternative medicine;

CF, Cyclophosphamide and Fludarabine;

CTX, Cyclophosphamide;

CODP, Cyclophosphamide, Vincristine, Daunorubicin, and Prednisone;

CVLP, Cyclophosphamide, Vincristine, L-asparaginase, and Prednisone;

DAC, Doxifluridine, Adriamycin, and Cyclophosphamide;

Dex, Dexamethasone;

DNR, Daunorubicin;

FLU, Fludarabine;

HR1, DMX, VCR, CF, CTX, Ara-C, and PEG-Asp

HR2, Methotrexate, Peasparagine, Vindesine, Dexamethasone, and Ifosfamide;

HR3, Methotrexate, Peasparagine, Vindesine, Cytarabine, and Etoposide;

Hyper-CVAD/A, Cyclophosphamide, Vincristine, Doxorubicin;

Hyper-CVAD/B, Methotrexate and Cytarabine;

IDA, Idarubicin;

L-asp, L-asparaginase;

LTFU, lost to follow-up;

MA, Mitoxantrone;

MIT, Mitoxantrone;

MTX, Methotrexate;

NR, nonresponse;

PC, Paclitaxel and Carboplatin;

PEG-Asp, PEG-asparaginase;

VCR, Vincristine;

VDLD, Vincristine, Daunorubicin or Doxorubicin, L-asparaginase, and Prednisone or Dexamethasone;

VDLP, Vincristine, Daunorubicin, L-asparaginase and Prednisone

VDCLP, Vincristine, Daunorubicin, Cyclophosphamide, L-asparaginase and Prednisone

VILP, Vincristine, Ifosfamide, L-asparaginase and Prednisone



VLP, ventriculolumbar perfusion chemotherapy;

VNLD, Vindesine, Mitoxantrone, L-Asparaginase and Dexamethasone

VP-16, Etoposide

\$ Patient 5 received CD19 mCAR-T treatment in June, 2017. On day 43 post-treatment, evaluation showed that the patient did not achieve CR, and the patient received the second mCAR-T treatment on the same day (Day 43), which led to a CR.

Table S2. Toxicity survey after CD19hsCAR-T treatment.

|                                     | Grade 1   | Grade 2   | Grade 3   | Grade 4   | Note                                                                                                                                                                                                                                                                                                                                                                                                                                                                                                                                                                                                                                                                                                                                                                                            |
|-------------------------------------|-----------|-----------|-----------|-----------|-------------------------------------------------------------------------------------------------------------------------------------------------------------------------------------------------------------------------------------------------------------------------------------------------------------------------------------------------------------------------------------------------------------------------------------------------------------------------------------------------------------------------------------------------------------------------------------------------------------------------------------------------------------------------------------------------------------------------------------------------------------------------------------------------|
| <b>Adverse events</b>               |           |           |           |           |                                                                                                                                                                                                                                                                                                                                                                                                                                                                                                                                                                                                                                                                                                                                                                                                 |
| Cytokine release syndrome           | 6 (75.0%) | 2 (25.0%) | 0         | 0         | N/A                                                                                                                                                                                                                                                                                                                                                                                                                                                                                                                                                                                                                                                                                                                                                                                             |
| Febrile neutropenia                 | 1 (12.5%) | 0         | 0         | 0         | N/A                                                                                                                                                                                                                                                                                                                                                                                                                                                                                                                                                                                                                                                                                                                                                                                             |
| Fever                               | 5 (62.5%) | 1 (12.5%) | 2 (25.0%) | 0         | Detailed information listed in Table S3.                                                                                                                                                                                                                                                                                                                                                                                                                                                                                                                                                                                                                                                                                                                                                        |
| <b>Hematological adverse events</b> |           |           |           |           |                                                                                                                                                                                                                                                                                                                                                                                                                                                                                                                                                                                                                                                                                                                                                                                                 |
| Anemia                              | 0         | 1 (12.5%) | 3 (37.5%) | 0         | <p>Patient 4: the hemoglobin level was 90.4 g/L on day 0, which was decreased to 61.9 g/L on day 47 after infusion (grade 3).</p> <p>Patient 5: the hemoglobin level was 100 g/L on day 0, which was decreased to 81.5 g/L on day 2 after infusion (grade 2).</p> <p>Patient 6: the hemoglobin level was 91 g/L on day 0, which decreased to 67.6 g/L on day 8 after infusion (grade 3).</p> <p>Patient 8: the hemoglobin level was 90.3 g/L on day 0, which was decreased to 63 g/L on day 30 after infusion (grade 3).</p>                                                                                                                                                                                                                                                                    |
| Decreased neutrophil count          | 0         | 1 (12.5%) | 0         | 2 (25.0%) | <p>Patient 4 had grade 4 neutropenia with a neutrophil count of <math>0.2 \times 10^9/L</math> on day 0; on day 9 after infusion, neutrophil count was <math>0.10 \times 10^9/L</math> (grade 4).</p> <p>Patient 5 had grade 4 neutropenia with a neutrophil count of <math>0.92 \times 10^9/L</math> on day 0; on day 36 after infusion, neutrophil count was 0 (grade 4).</p>                                                                                                                                                                                                                                                                                                                                                                                                                 |
| Decreased platelet count            | 0         | 0         | 0         | 4 (50.0%) | <p>Patient 4 had grade 3 thrombocytopenia with a platelet count of <math>35.9 \times 10^{12}/L</math> on day 0; on day 2 after infusion, platelet count was <math>15.9 \times 10^{12}/L</math> (grade 4).</p> <p>Patient 5: platelet count was <math>120.3 \times 10^{12}/L</math> on day 0, which was decreased to <math>7.9 \times 10^{12}/L</math> on day 44 after infusion (grade 4).</p> <p>Patient 6: platelet count was <math>238.4 \times 10^{12}/L</math> on day 0, which was decreased to <math>74.4 \times 10^{12}/L</math> on day 8 after infusion (grade 4).</p> <p>Patient 8 had grade 3 thrombocytopenia with a platelet count of <math>21.8 \times 10^{12}/L</math> on day 0, which was decreased to <math>14.7 \times 10^{12}/L</math> on day 30 after infusion (grade 4).</p> |
| Decreased white blood cell count    | 0         | 1 (12.5%) | 0         | 4 (50.0%) | <p>Patient 4 had grade 4 leukopenia with a white cell count of <math>0.42 \times 10^9/L</math> on day 0; on day 2 after infusion, white cell count was <math>0.56 \times 10^9/L</math> (grade 4).</p> <p>Patient 5 had grade 3 leukopenia with a white cell count of <math>1.08 \times 10^9/L</math> on day 0, which was decreased to <math>0.39 \times 10^9/L</math> on day 36 after infusion (grade 4).</p> <p>Patient 6 had grade 3 leukopenia with a white cell count of <math>1.09 \times 10^9/L</math> on day 0, which was decreased to <math>0.26 \times 10^9/L</math> on day 5 after infusion (grade 4).</p> <p>Patient 8 had grade 4 leukopenia with a white cell count of <math>0.9 \times 10^9/L</math> on day 0, which was decreased to <math>0.43 \times 10^9/L</math></p>         |

on day 30 after infusion (grade 4).

| <b>Chemical laboratory test</b> |           |   |   |   |     |
|---------------------------------|-----------|---|---|---|-----|
| Hypokalemia                     | 2 (25.0%) | 0 | 0 | 0 | N/A |
| <b>Nervous system events</b>    |           |   |   |   |     |
| Ataxia                          | 0         | 0 | 0 | 0 | N/A |
| Dysphasia                       | 0         | 0 | 0 | 0 | N/A |
| Headache                        | 0         | 0 | 0 | 0 | N/A |
| Tremor                          | 0         | 0 | 0 | 0 | N/A |
| Ataxia                          | 0         | 0 | 0 | 0 | N/A |

Note: N/A, not applicable.

Table S3. Survey of body temperature after CD19hsCAR-T treatment.

| Patient No. | Repeat dosages | Infusions       | Start time with fever<br>(days after infusion) | Duration (days) | Peak value (°C) | Grade |
|-------------|----------------|-----------------|------------------------------------------------|-----------------|-----------------|-------|
| Patient 1   | 1              | 1 <sup>st</sup> | Day 7                                          | 4               | 39.4            | 2     |
| Patient 2   | 1              | 1 <sup>st</sup> | Day 2                                          | 3               | 38.6            | 1     |
| Patient 3   | 1              | 1 <sup>st</sup> | Day 5                                          | 4               | 40.8            | 3     |
| Patient 4   | 2              | 1 <sup>st</sup> | Day 8                                          | 5               | 38.9            | 1     |
|             |                | 2 <sup>nd</sup> | Day 2                                          | 3               | 38.5            | 3     |
| Patient 5   | 2              | 1 <sup>st</sup> | Day 10                                         | 1               | 39.0            | 1     |
|             |                | 2 <sup>nd</sup> | Day 3                                          | 6               | 39.5            | 2     |
| Patient 6   | 1              | 1 <sup>st</sup> | Day 5                                          | 3               | 40.5            | 3     |
| Patient 7   | 1              | 1 <sup>st</sup> | Day 7                                          | 3               | 38.7            | 1     |
| Patient 8   | 1              | 1 <sup>st</sup> | Day 3                                          | 5               | 38.9            | 1     |

Table S4. Anti-CAR response in patients' sera before and after hsCAR-T treatment.

| Sample ID | Antibody isotypes |                   | IgA              |                   | IgG              |                   | IgM              |           |
|-----------|-------------------|-------------------|------------------|-------------------|------------------|-------------------|------------------|-----------|
|           | OD450             |                   |                  |                   |                  |                   |                  |           |
|           | Detection time    | Before<br>hsCAR-T | After<br>hsCAR-T | Before<br>hsCAR-T | After<br>hsCAR-T | Before<br>hsCAR-T | After<br>hsCAR-T |           |
| Sample ID | Antigen           |                   |                  |                   |                  |                   |                  |           |
| Patient 1 | CD19 mCAR         | <b>0.590755</b>   | <b>0.219637</b>  | 0.0895341         | 0.092022         | 0.0562419         | -0.0511632       |           |
|           | CD19 hsCAR        | -0.122193         | -0.105871        | -0.143873         | -0.098112        | -0.0394008        | -0.026955        |           |
| Patient 2 | CD19 mCAR         | 0.178135          | <b>0.345866</b>  | 0.0974262         | <b>0.174307</b>  | 0.0627561         | -0.043684        |           |
|           | CD19 hsCAR        | 0.18              | 0.107558         | 0.086011          | -0.111115        | 0.0524062         | -0.034588        |           |
| Patient 3 | CD19 mCAR         | <b>0.212765</b>   | <b>0.472216</b>  | 0.113288          | 0.122573         | 0.0689928         | -0.036198        |           |
|           | CD19 hsCAR        | 0.053714          | -0.072719        | 0.105453          | 0.016531         | 0.0624112         | -0.0522147       |           |
| Patient 4 | 1 <sup>st</sup>   | CD19 mCAR         | 0.083113         | 0.074954          | 0.0889832        | 0.0983526         | 0.0601998        | 0.0625049 |
|           |                   | CD19 hsCAR        | 0.110526         | 0.06637           | 0.0775209        | 0.090287          | 0.0528421        | 0.0553977 |
|           | 2 <sup>nd</sup>   | CD19 mCAR         | 0.068653         | 0.067442          | 0.062543         | 0.058995          | 0.058744         | 0.059372  |
|           |                   | CD19 hsCAR        | 0.083062         | 0.067521          | 0.061214         | 0.065424          | 0.068849         | 0.069164  |
| Patient 5 | 1 <sup>st</sup>   | CD19 mCAR         | 0.113151         | 0.084973          | 0.107124         | 0.105014          | 0.0622423        | 0.0666344 |
|           |                   | CD19 hsCAR        | 0.053769         | 0.034032          | 0.0782874        | 0.0856885         | 0.0603099        | 0.0525453 |
|           | 2 <sup>nd</sup>   | CD19 mCAR         | 0.082129         | 0.100587          | 0.065993         | 0.138982          | 0.063606         | 0.072683  |
|           |                   | CD19 hsCAR        | 0.064316         | 0.092629          | <b>0.16576</b>   | 0.096239          | 0.066692         | 0.072322  |
| Patient 6 | CD19 mCAR         | 0.097709          | 0.101585         | 0.063115          | 0.064281         | 0.055453          | 0.067605         |           |
|           | CD19 hsCAR        | 0.056044          | 0.058322         | 0.054451          | 0.058942         | 0.056857          | 0.053025         |           |
| Patient 7 | CD19 mCAR         | <b>0.487719</b>   | <b>0.359786</b>  | <b>0.277947</b>   | <b>0.174973</b>  | 0.07765           | 0.076889         |           |
|           | CD19 hsCAR        | 0.087341          | 0.077936         | 0.078788          | 0.107246         | 0.095948          | 0.077086         |           |
| Patient 8 | CD19 mCAR         | 0.097589          | 0.075321         | 0.113756          | 0.120719         | 0.049112          | 0.050341         |           |
|           | CD19 hsCAR        | 0.050731          | 0.083058         | 0.049352          | 0.071573         | 0.052006          | 0.052242         |           |
| HC 1      | CD19 mCAR         | -0.042402         |                  | 0.0144479         |                  | 0.0020803         |                  |           |
|           | CD19 hsCAR        | -0.037279         |                  | 0.0160554         |                  | 0.0035765         |                  |           |
| HC 2      | CD19 mCAR         | -0.019394         |                  | -0.1572369        |                  | -0.0015892        |                  |           |
|           | CD19 hsCAR        | -0.037279         |                  | -0.0048031        |                  | -0.0053109        |                  |           |

Note:

1. Patients 1 to 8 received murine-based CD19CAR-T treatment at least once prior to CD19hsCAR-T therapy;
2. Patient 4, Patient 5, and Patient 6 received CD19hsCAR-T treatment after HSC transplantation;
3. Patient 5 displayed primary resistance to murine-based CD19CAR-T treatment, but achieved CR after the 2<sup>nd</sup> infusion;
4. Patient 7 displayed primary resistance to murine-based CD19CAR-T treatment;
5. Patient 8 displayed primary resistance to murine-based CD19CAR-T treatment, but achieved CR for 6 mon after infusion of humanized CD19CAR-T (from a different group) bridging to HSC transplantation;
6. HC 1 and HC 2 were healthy donors used as negative controls;
7. The cut-off-value for positivity was set as 0.2, and positive readings were highlighted as bold; the readings close to the cut-off-value were also highlighted in bold with dark grey background.

Table S5. Subpopulation analysis of the final products for the 8 patients.

|                          |                                 | Patient No. |       |        |       |       |       |       |       |
|--------------------------|---------------------------------|-------------|-------|--------|-------|-------|-------|-------|-------|
|                          |                                 | 1           | 2     | 3      | 4     | 5     | 6     | 7     | 8     |
| Starting<br>PBMCs        | CD3+ in PBMCs                   | 29.8%       | 32%   | 6.9%   | 46.2% | 8.1%  | 29.6% | 8.0%  | 10.0% |
|                          | CD19+ in PBMCs                  | 0.7%        | 0.8%  | 1.95%  | 1.0%  | 2.1%  | 4.01% | 1.7%  | 2.1%  |
|                          | CD27+CD45RO-PD-1- in CD8+       | 25.9%       | 31.4% | 8.28%  | 38.1% | 25.9% | 14.3% | 32.9% | 14.9% |
|                          | Tem% in CD8+/CD3+               | 20.6%       | 14.7% | 29.4%  | 4.22% | 2.93% | 14.2% | OOL   | 0.72% |
|                          | Tem% in CD8+/CD3+               | 44.6%       | 44.9% | 32.5%  | 38.2% | 32.9% | 51.9% | 0.89% | 15.5% |
|                          | Starting PBMC ( $\times 10^8$ ) | 2.7         | 2.88  | 3.45   | 2.51  | 2.1   | 3.58  | 2.16  | 3.12  |
|                          | Ratio of CD4/CD8                | 0.54        | 0.68  | 2.3    | 1.87  | 1.35  | 1.77  | 0.77  | 0.64  |
| Final<br>Product<br>(FP) | CD3+ in FP                      | 98.4%       | 97.7% | 95.0%  | 98.7% | 91.3% | 97.2% | 98.0% | 95.4% |
|                          | CD19+ in FP                     | OOL         | OOL   | OOL    | OOL   | OOL   | OOL   | OOL   | OOL   |
|                          | CD27+CD45RO-PD-1- in CD8+       | 12.7%       | 7.28% | 13.75% | 15.3% | 48.1% | 10.4% | 45.1% | 30.7% |
|                          | Tem% in CD8+/CAR+               | 70.1%       | 64.9% | 64.3%  | 61.2% | 53.3% | 9.47% | 11.0% | 61.1% |
|                          | Tem% in CD8+/CAR+               | 25.9%       | 23.5% | 25.1%  | 16.4% | 40.4% | 20.6% | 19.1% | 27.1% |
|                          | Final product ( $\times 10^7$ ) | 57.5        | 58.5  | 67.6   | 31.4  | 35.2  | 76.5  | 53.9  | 68.4  |
|                          | CAR% in CD3+                    | 49.5%       | 39.3% | 38.1%  | 35.1% | 33.3% | 36.6% | 50.0% | 42.3% |
| Ratio of CD4/CD8         | 0.17                            | 8.4         | 1.06  | 0.87   | 1.00  | 0.99  | 0.54  | 0.89  |       |

Note: FP, final product; OOL, out of limit.

Table S6. Patients' clinical responses after CD19hs CAR-T treatment

| Patient No. | Before CD19hs CAR-T infusions |                  |       |               | Infusions of CD19hs CAR-T |                     |                  |                                |       |               |        |         | After CD19hs CAR-T infusions |                  |       |               |                    |                  |       |               | Response after 1 month | Bridging to HSCT after infusions | Follow-up |              |      |                                                                                                                                                                                                                                                                |
|-------------|-------------------------------|------------------|-------|---------------|---------------------------|---------------------|------------------|--------------------------------|-------|---------------|--------|---------|------------------------------|------------------|-------|---------------|--------------------|------------------|-------|---------------|------------------------|----------------------------------|-----------|--------------|------|----------------------------------------------------------------------------------------------------------------------------------------------------------------------------------------------------------------------------------------------------------------|
|             | Tumor burden in BM            |                  | CSF % | Pre-B in PB % | Cell resource             | HLA matching status | Repeat infusions | Dosage $\times 10^6/\text{kg}$ | CRS   |               |        |         | Day 15                       |                  |       |               | Day 30             |                  |       |               |                        |                                  |           |              |      |                                                                                                                                                                                                                                                                |
|             | Morphology %                  | Flow cytometry % |       |               |                           |                     |                  |                                | Grade | Neurotoxicity | Tocili | Steroid | Tumor burden in BM           |                  | CSF % | Pre-B in PB % | Tumor burden in BM |                  | CSF % | Pre-B in PB % |                        |                                  |           |              |      |                                                                                                                                                                                                                                                                |
|             |                               |                  |       |               |                           |                     |                  |                                |       |               |        |         | Morphology %                 | Flow cytometry % |       |               | Morphology %       | Flow cytometry % |       |               |                        |                                  |           |              |      |                                                                                                                                                                                                                                                                |
| 1           | 4                             | 2.28             | 0     | 0             | Auto                      | N/A                 | 1                | 1                              | 1     | N             | N      | Y       | 0                            | 0                | 0     | 0             | 0                  | 0                | 0     | 0             | 0                      | 0                                | 0         | CR with MRD- | Y    | Allo-HSCT 2 mon later; CMR for 36 mon.                                                                                                                                                                                                                         |
| 2           | 46                            | 34.86            | 0     | 0             | Auto                      | N/A                 | 1                | 0.3                            | 1     | N             | N      | Y       | 10.5                         | 14.98            | 0     | 0             | 82                 | 71.84            | 0     | 0             | 0                      | 0                                | NR        | N/A          | LTFU |                                                                                                                                                                                                                                                                |
| 3           | 0.02                          | 0                | 66.13 | 0             | Allo                      | 5/10                | 1                | 1                              | 1     | N             | N      | Y       | 0                            | 0                | 0     | 0             | 0                  | 0                | 0     | 0             | 0                      | 0                                | 0         | CR with MRD- | Y    | Allo-HSCT 4 mon later; CMR for 9 mon; and then died of infection.                                                                                                                                                                                              |
| 4           | 29                            | 15.13            | 0     | 0             | Allo                      | 5/10                | 2                | 3                              | 1     | N             | N      | Y       | 0                            | 0                | 0     | 0             | 0                  | 0                | 0     | 0             | 0                      | 0                                | 0         | CR with MRD- | N    | 1. CMR for 11 mon after the 1 <sup>st</sup> infusion; and then relapsed in BM;<br>2. Achieved CR with MDR+ after the 2 <sup>nd</sup> infusion bridging to allo-HSCT; CMR for 18 mon.                                                                           |
|             | NR                            | 4.17             | 0     | 0             |                           |                     |                  | 3                              | 1     | N             | N      | Y       | ND                           | 0.78             | 0     | 0             | ND                 | 0.00032          | 0     | 0             | CR with MRD+           | Y                                |           |              |      |                                                                                                                                                                                                                                                                |
| 5           | 6                             | 34.74            | 0     | 0             | Allo                      | 5/10                | 2                | 3                              | 1     | N             | N      | Y       | 0                            | 0                | 0     | 0             | 0                  | 0                | 0     | 0             | 0                      | 0                                | 0         | CR with MRD- | N    | 1. CMR for 11 mon after the 1 <sup>st</sup> infusion; and then relapsed in BM.<br>2. CMR for 1 mon after the 2 <sup>nd</sup> infusion, and then relapsed in BM;<br>3. Received CD22mCAR-T, $5 \times 10^5/\text{kg}$ , with nonresponse; then died of relapse. |
|             | 8                             | 74.5             | 0     | 0             |                           |                     |                  | 3                              | 2     | N             | Y      | Y       | ND                           | 9.34             | 0     | 0             | ND                 | 0                | 0     | 0             | 0                      | CR with MRD-                     | N         |              |      |                                                                                                                                                                                                                                                                |
| 6           | 17                            | 5.58             | 0     | 0             | Allo                      | 5/10                | 1                | 1.5                            | 2     | N             | Y      | Y       | 0                            | 0                | 0     | 0             | 0                  | 0                | 0     | 0             | 0                      | 0                                | 0         | CR with MRD- | N    | CMR for 9 mon and then LTFU.                                                                                                                                                                                                                                   |
| 7           | 85.5                          | 74.47            | 0     | 0             | Allo                      | 10/10               | 1                | 2                              | 1     | N             | N      | Y       | 0                            | 0.0045           | 0     | 0             | 0                  | 0                | 0     | 0             | 0                      | 0                                | 0         | CR with MRD- | Y    | Allo-HSCT 2 mon later; and maintained in CMR for 12 mon, and then LTFU in Oct. 2020.                                                                                                                                                                           |
| 8           | 25.5                          | 33.59            | 0     | 0             | Allo                      | 5/10                | 1                | 2                              | 2     | N             | N      | Y       | 0                            | 0                | 0     | 0             | 0                  | 0                | 0     | 0             | 0                      | 0                                | 0         | CR with MRD- | N    | CRi with MRD- for 2 mon, and then died of intracranial hemorrhage.                                                                                                                                                                                             |

Note:

Allo, allogeneic;

allo-HSCT, allogeneic hematopoietic stem cell transplantation;

Auto, autologous;

BM, bone marrow;

CD19hsCAR-T, chimeric antigen receptor T cells engineered with humanized selective CD19-specific scFv;

CMR, complete molecular remission;

CRS, cytokine release syndrome;

CSF, Cerebrospinal fluid;

LTFU, lost to follow-up;

MRD, minimal residual disease;

N, no;

NR, nonresponse

PB, peripheral blood;

Tocili, tocilizumab;

Y, yes.
